# Supplementary material for: Structures of defects on anatase TiO2(001) surfaces
Source: Royal Society of Chemistry journal article supplement (doi:10.1039/c7nr02458d), 2017-01-01
Supplement: c7nr02458d1.pdf [file c7nr02458d1.pdf]

## Structure of Defects on anatase TiO<sub>2</sub>(001) Surface

### Supporting Information

Yongliang Shi,<sup>1</sup> Huijuan Sun,<sup>1,2</sup> Manh Cuong Nguyen,<sup>3</sup> Caizhuang Wang,<sup>3</sup> Kaiming Ho,<sup>3</sup> Wissam A. Saidi,<sup>4</sup> and Jin Zhao<sup>1,5,6\*</sup>

<sup>1</sup>*ICQD/Hefei National Laboratory for Physical Sciences at Microscale, and Key Laboratory of Strongly-Coupled Quantum Matter Physics, Chinese Academy of Sciences, and Department of Physics, University of Science and Technology of China, Hefei, Anhui 230026, China*

<sup>2</sup>*Department of Physics, Qingdao University, Qingdao, 266071, China*

<sup>3</sup>*Ames Laboratory—US DOE and Department of Physics and Astronomy, Iowa State University, Ames, IA 50011, United States*

<sup>4</sup>*Department of Mechanical Engineering and Materials Science, University of Pittsburgh, Pittsburgh, Pennsylvania 15261, United States*

<sup>5</sup>*Department of Physics and Astronomy, University of Pittsburgh, Pittsburgh PA 15260, United States*

<sup>6</sup>*Synergetic Innovation Center of Quantum Information & Quantum Physics, University of Science and Technology of China, Hefei, Anhui 230026, China*

#### 1. Spatial orbital distribution calculated by PBE and HSE functional.

We compared the spatial orbital distribution calculated by PBE and HSE functional. As shown in Figure S1, the difference between them is insignificant. Therefore, in our work we use PBE and (4×8) unit cell to simulate the STM image for different O<sub>V</sub> and Ti<sub>ini</sub> structures.

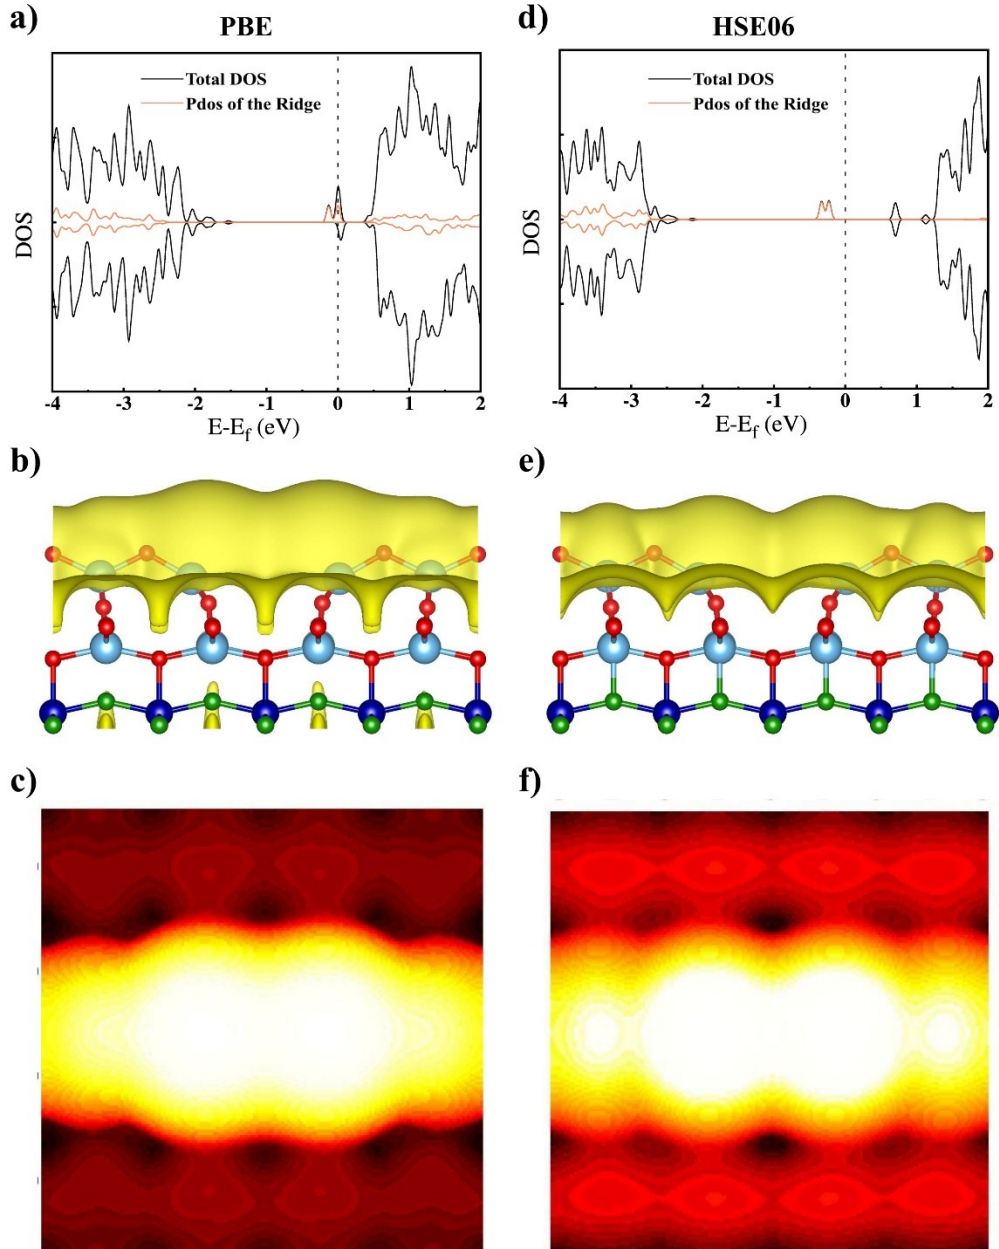

Figure S1. The DOS, orbital spatial distribution and simulated STM image of  $O_V_I$  structure obtained by PBE (a-c) and HSE06 (d-f).

## 2. Conversion energy barrier of the equivalent oxidized structures.

$1/2ML(D)$  and  $1ML(M)$  structures have four equivalent structures. The conversion barrier between them is shown in Table S1. Both the conversion barrier of  $1/2ML(D)$  and the conversion barrier across the ridge of  $1ML(M)$  are smaller than 0.26eV. But the the conversion barrier parallel the ridge of  $1ML(D)$  is larger than 1eV. Therefore in our work we average the four equivalent structures of  $1/2ML(D)$  and two equivalent structures of  $1ML(M)$  to get the simulated STM images.

| Barrier(eV) | $1/2ML(D)$ | $1ML(M)$ |
|-------------|------------|----------|
|-------------|------------|----------|

|                    |       |       |
|--------------------|-------|-------|
| Across the ridge   | 0.040 | 0.086 |
| Parallel the ridge | 0.251 | 1.01  |

Table S1. The calculated energy barrier between the oxidized structure and its symmetrical image across and parallel the ridge.

### 3. Observations in the STM measurements.

In the work by Wang et al.<sup>1</sup>, the dark spot, bright spot and half-dark-half-bright spots have been observed. We marked the three kinds of different defects in Figure S2.

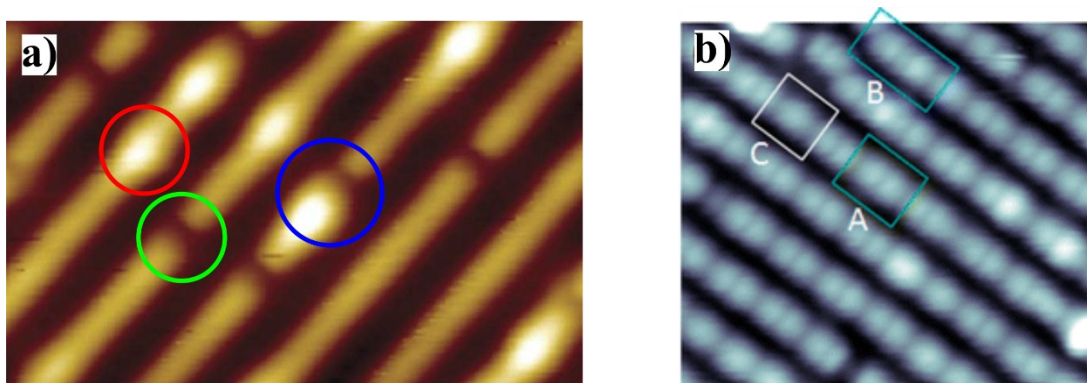

Figure S2. (a) High-resolution STM images of the reduced anatase  $\text{TiO}_2(001)-(1 \times 4)$  surface, which is from Figure 2(a) of reference<sup>1</sup>. We mark bright, dark and half-bright-half-dark defect with red, green and blue circles, respectively. (b) Figure 2(a) of reference<sup>2</sup>, three type of feature (A, B, C).

1. Y. Wang, H. Sun, S. Tan, H. Feng, Z. Cheng, J. Zhao, A. Zhao, B. Wang, Y. Luo, J. Yang and J. G. Hou, *Nat. Commun.*, 2013, **4**, 2214.
